# Supplementary material
Source: PubMed Central journal article supplement (PMC9522847)
Supplement: 41598_2022_20747_MOESM1_ESM.pdf [file 41598_2022_20747_MOESM1_ESM.pdf]

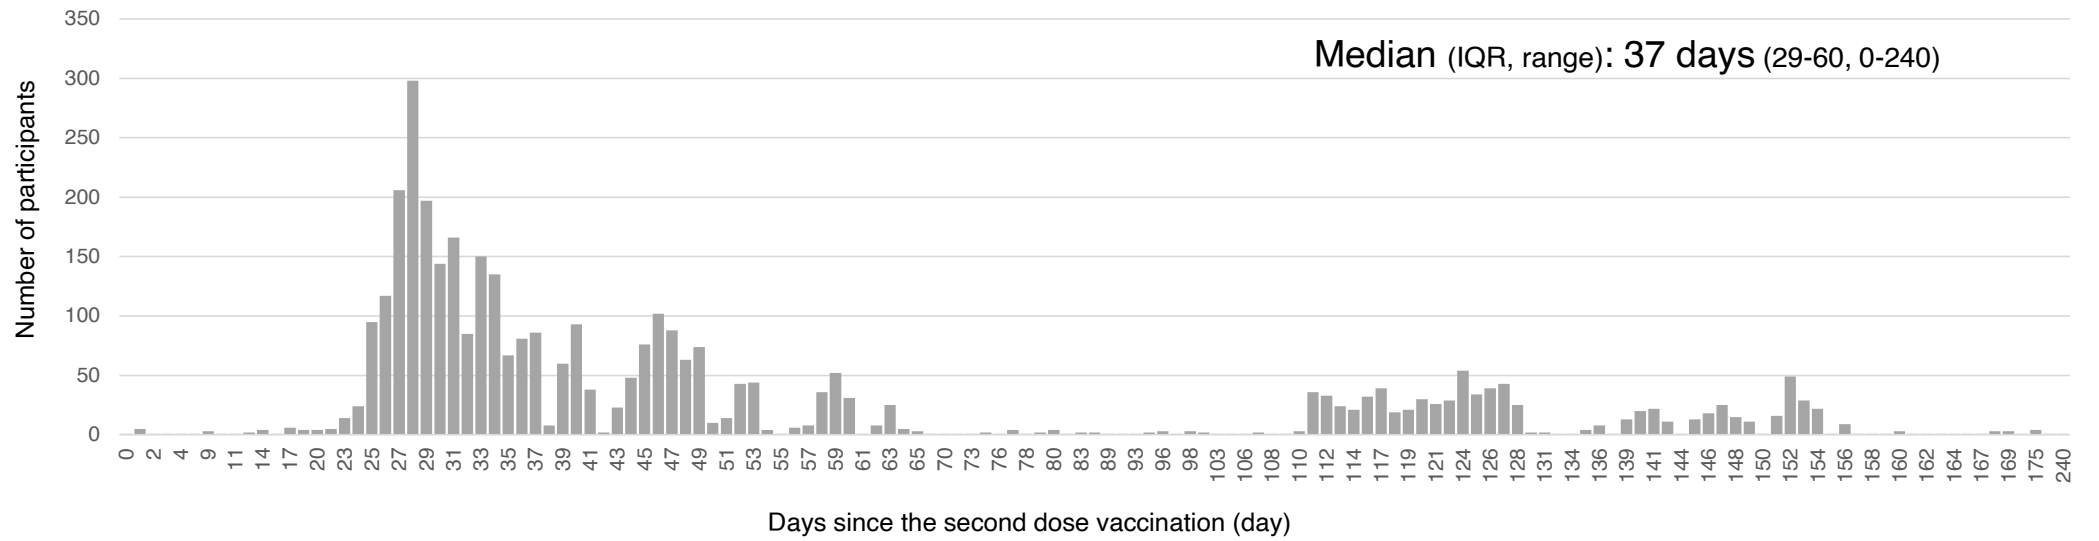

Supplementary figure 1. Distribution of days since the second dose in 3,744 participants
