# Supplementary material
Source: PubMed Central journal article supplement (PMC9522847)
Supplement: 41598_2022_20747_MOESM2_ESM.pdf [file 41598_2022_20747_MOESM2_ESM.pdf]

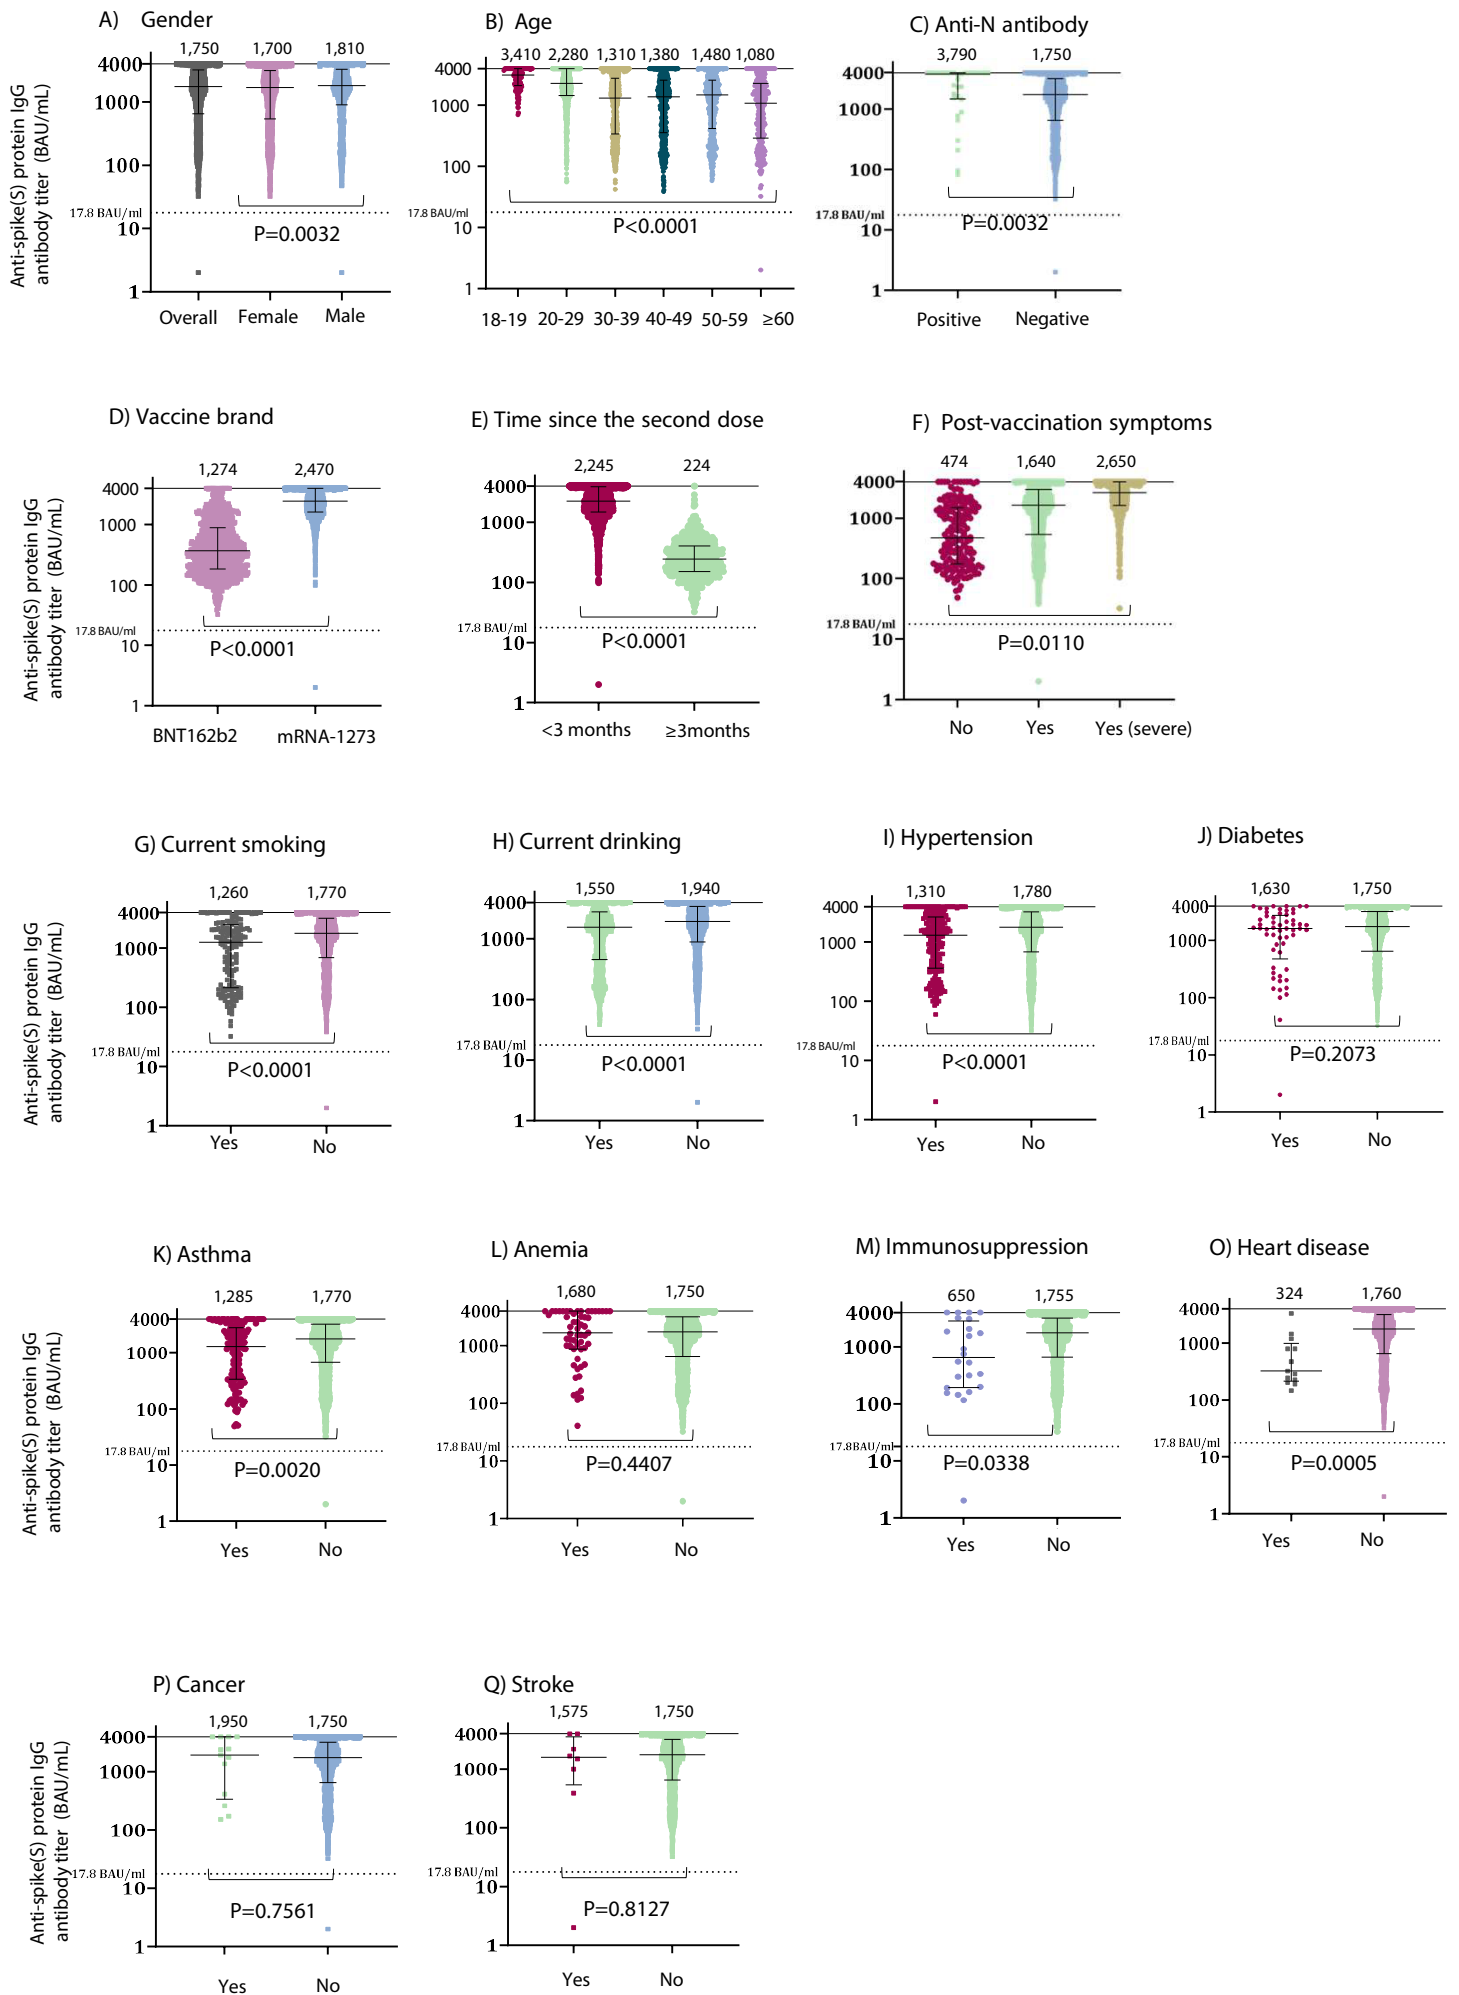

Supplementary figure 2. Anti-spike (S) protein IgG antibody titers in 3,744 healthy volunteers after the second dose of mRNA COVID-19 vaccine
